# Supplementary material
Source: PubMed Central journal article supplement (PMC9357437)
Supplement: mmc1.pdf [file mmc1.pdf]

## Supplementary Materials for

# Metabolic perturbation associated with COVID-19 disease severity and SARS-CoV-2 replication

Authors: Shuba Krishnan<sup>1</sup>, Hampus Nordqvist<sup>2</sup>, Anoop T. Ambikan<sup>1</sup>, Soham Gupta<sup>1</sup>, Maike Sperk<sup>1</sup>, Sara Svensson-Akusjärvi<sup>1</sup>, Flora Mikaeloff<sup>1</sup>, Rui Benfeitas<sup>3</sup>, Elisa Saccon<sup>1</sup>, Sivasankaran Munusamy Ponnann<sup>4</sup>, Jimmy Esneider Rodriguez<sup>5</sup>, Negin Nikouyan<sup>1</sup>, Amani Odeh<sup>6</sup>, Gustaf Ahlén<sup>1</sup>, Muhammad Asghar<sup>6</sup>, Matti Sällberg<sup>1</sup>, Jan Vesterbacka<sup>7</sup>, Piotr Nowak<sup>7,8</sup>, Ákos Végvári<sup>5</sup>, Anders Sönnerborg<sup>1,6</sup>, Carl Johan Treutiger<sup>2,7</sup>, Ujjwal Neogi<sup>1\*</sup>.

\*Correspondence to: Ujjwal Neogi ([ujjwal.neogi@ki.se](mailto:ujjwal.neogi@ki.se))

### This PDF file includes:

Tables S1 to S3  
Figures. S1 to S7

**Table S1.**

List of reagents, kits and antibodies

| <b>Antibodies</b>                                                                                   |                                 |                       |
|-----------------------------------------------------------------------------------------------------|---------------------------------|-----------------------|
| CD4-BUV395-SK3                                                                                      | BD Biosciences                  | 563552                |
| CD8-APC-RPA-T8                                                                                      | Biolegend                       | 301014                |
| CD14-BV510-M5E2                                                                                     | Biolegend                       | 301842                |
| CD3-BV711-OKT3                                                                                      | Biolegend                       | 317328                |
| CD16-BV786-3G8 (RUO)                                                                                | BD Biosciences                  | 563690                |
| GLUT1-FITC-# 202915                                                                                 | R&D Systems                     | FAB1418F              |
| xCT-AF594                                                                                           | Novus Biologicals               | NB300-318AF594        |
| CD8-PerCP-HIT8a                                                                                     | Biolegend                       | 300922                |
| CD3-FITC-OKT3                                                                                       | Biolegend                       | 317306                |
| Anti-Human IgG Peroxidase                                                                           | Sigma-Aldrich                   | A0170                 |
| SARS-CoV-2 N protein                                                                                | Varnaité et al., 2020           | GenScript             |
| Tetramethylbenzidine                                                                                | Sigma-Aldrich                   | T0440                 |
| <b>Critical Commercial Assays</b>                                                                   |                                 |                       |
| Olink Immuno-Oncology                                                                               | Olink Technology, Sweden        | Immuno-Oncology Panel |
| Global Metabolomics (HD4)                                                                           | Metabolon. Inc., US             | HD4                   |
| Human MBL Quantikine ELISA Kit                                                                      | R&D systems                     | DMBL00                |
| Anti-Mouse Ig, κ/Negative Control Compensation Particles Set                                        | BD Biosciences                  | 552843                |
| AbC™ Total Antibody Compensation Bead Kit                                                           | Invitrogen                      | A10513                |
| ArC™ Amine Reactive Compensation Bead Kit                                                           | Invitrogen                      | A10346                |
| DMEM-high glucose                                                                                   | Sigma-Aldrich, USA              | D6429-500ml           |
| Bio-rad DC protein assay kit                                                                        | Bio-Rad Laboratories, USA       | #5000116              |
| TaqMan Fast Virus 1-Step Master Mix                                                                 | ThermoFisher Scientific         | 4444434               |
| Direct-zol™ RNA Miniprep Kit                                                                        | Zymo Research                   | R2051                 |
| Tempus™ Blood RNA Tubes                                                                             | Applied Biosystems              | 4342792               |
| Tempus™ Spin RNA Isolation Kit                                                                      | Invitrogen                      | 4380204               |
| PrimeDirect™ Probe RT-qPCR Mix                                                                      | TaKaRa, Japan                   | RR600B                |
| KAPA SYBR Fast qPCR kit                                                                             | Roche                           | KK4602                |
| TMTpro 16plex Label Reagent set                                                                     | ThermoFisher Scientific         | A44520                |
| Absolute Human Telomere Length and Mitochondrial DNA Copy Number Dual Quantification qPCR Assay Kit | ScienCell Research Laboratories | #8958                 |
| QuantiNova SYBR® Green PCR Kit                                                                      | Qiagen                          | 208054                |
| alamarBlue™ Cell Viability Reagent                                                                  | Invitrogen                      | DAL1025               |

**Table S2.**

List of primer and probe sequences

|                                                                 |     |
|-----------------------------------------------------------------|-----|
| E_Sarbeco_F1-5'-ACAGGTACGTTAATAGTTAATAGCGT-3'                   | WHO |
| E_Sarbeco_R2-5'-ATATTGCAGCAGTACGCACACA-3'                       | WHO |
| E_Sarbeco_Probe-5'-[FAM]-ACACTAGCCATCCTTACTGCGCTTCG-[BBQ650]-3' | WHO |
| RNAseP-F-5'-AGATTTGGACCTGCGAGCG-3'                              | CDC |
| RNAseP-R-5'-GAGCGGCTGTCTCCACAAGT-3'                             | CDC |
| RNAseP-Probe-5'-[FAM]-TTCTGACCTGAAGGCTCTGCGCG-[BHQ1]-3'         | CDC |

**Table S3.**

Clinical features of study population

| Parameter                                                  | HC         | Hospitalised-Mild | Hospitalised Severe | P values* | P values** |
|------------------------------------------------------------|------------|-------------------|---------------------|-----------|------------|
| number                                                     | 31         | 29                | 12                  |           |            |
| Age, years; median (IQR)                                   | 48 (46-55) | 57 (44-63)        | 57 (52-69)          | 0.0277    | 0.2831     |
| Gender, Male, n (%)                                        | 24 (77%)   | 23 (79%)          | 11 (91%)            | 0.557     | 0.6514     |
| BMI, Median (IQR)                                          | 24 (21-25) | 29 (25-31)        | 28 (25-34)          | 0.0016    | 0.8622     |
| Sample collection post hospitalisation, days, median (IQR) | -          | 2 (1-3)           | 3 (2-4)             |           | 0.1170     |
| Comorbidities, yes (%)                                     | -          | 13 (45%)          | 8 (66%)             |           | 0.3058     |
| Obesity, yes (%)                                           |            | 2 (7%)            | 1 (8%)              |           | 1          |
| Type 2 Diabetes, yes (%)                                   |            | 2 (7%)            | 1 (8%)              |           | 1          |
| Hypertension, yes (%)                                      |            | 7 (24%)           | 4 (33%)             |           | 0.7011     |
| Asthma, yes (%)                                            |            | 4 (14%)           | 3 (25%)             |           | 0.3978     |

\*within the groups, \*\*between hospitalized mild and severe

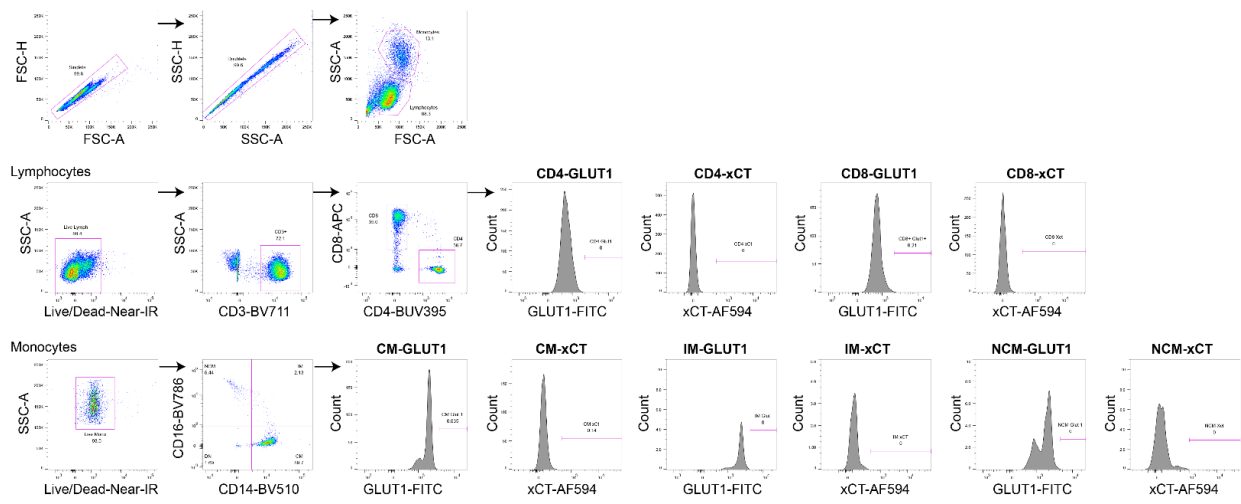

**Figure S1:** Gating strategy of flow cytometry data.

| Pt ID                 | Plate no. | Mean (1:200) | Mean (1:400) | Mean (1:800) | Mean (1:1600) | Antibody status |
|-----------------------|-----------|--------------|--------------|--------------|---------------|-----------------|
| HC-03                 | 1         | 2,97         | 2,43         | 1,470        | 0,840         | POS             |
| HC-10                 | 1         | 3,00         | 2,70         | 1,768        | 0,995         | POS             |
| HC-12                 | 2         | 3,00         | 2,32         | 1,370        | 0,756         | POS             |
| HC-14                 | 2         | 2,70         | 1,65         | 0,937        | 0,526         | POS             |
| HC-15                 | 2         | 3,00         | 3,00         | 3,000        | 3,000         | POS             |
| HC-18                 | 2         | 2,69         | 1,52         | 0,859        | 0,427         | POS             |
| HC-23                 | 3         | 3,00         | 2,82         | 1,825        | 1,120         | POS             |
| HC-26                 | 3         | 2,87         | 2,00         | 1,119        | 0,581         | POS             |
| HC-13                 | 2         | 0,62         | 0,36         | 0,178        | 0,098         | POS             |
| HC-32                 | 3         | 0,19         | 0,10         | 0,063        | 0,043         | POS             |
| HC-21                 | 3         | 0,16         | 0,09         | 0,051        | 0,042         | NEG             |
| HC-06                 | 1         | 0,16         | 0,08         | 0,045        | 0,029         | NEG             |
| HC-17                 | 2         | 0,15         | 0,09         | 0,053        | 0,038         | NEG             |
| HC-31                 | 3         | 0,14         | 0,07         | 0,046        | 0,037         | NEG             |
| HC-22                 | 3         | 0,13         | 0,07         | 0,043        | 0,036         | NEG             |
| HC-24                 | 3         | 0,12         | 0,07         | 0,045        | 0,034         | NEG             |
| HC-25                 | 3         | 0,14         | 0,06         | 0,042        | 0,030         | NEG             |
| HC-01                 | 1         | 0,10         | 0,05         | 0,037        | 0,024         | NEG             |
| HC-02                 | 1         | 0,06         | 0,03         | 0,023        | 0,019         | NEG             |
| HC-04                 | 1         | 0,09         | 0,05         | 0,033        | 0,025         | NEG             |
| HC-05                 | 1         | 0,03         | 0,02         | 0,015        | 0,020         | NEG             |
| HC-07                 | 1         | 0,05         | 0,03         | 0,019        | 0,014         | NEG             |
| HC-08                 | 1         | 0,08         | 0,04         | 0,028        | 0,021         | NEG             |
| HC-09                 | 1         | 0,07         | 0,04         | 0,026        | 0,020         | NEG             |
| HC-11                 | 2         | 0,08         | 0,05         | 0,032        | 0,124         | NEG             |
| HC-16                 | 2         | 0,08         | 0,05         | 0,032        | 0,023         | NEG             |
| HC-19                 | 2         | 0,05         | 0,03         | 0,026        | 0,019         | NEG             |
| HC-20                 | 2         | 0,06         | 0,04         | 0,028        | 0,023         | NEG             |
| HC-27                 | 3         | 0,10         | 0,07         | 0,042        | 0,033         | NEG             |
| HC-28                 | 3         | 0,07         | 0,04         | 0,032        | 0,027         | NEG             |
| HC-29                 | 3         | 0,07         | 0,04         | 0,029        | 0,024         | NEG             |
| Considered Ab+ $\geq$ |           | 0,17         | 0,11         | 0,08         | 0,07          |                 |

**Figure. S2.** The IgG Ab showed 10 of the HC were were CoV-2 Ab-positive.

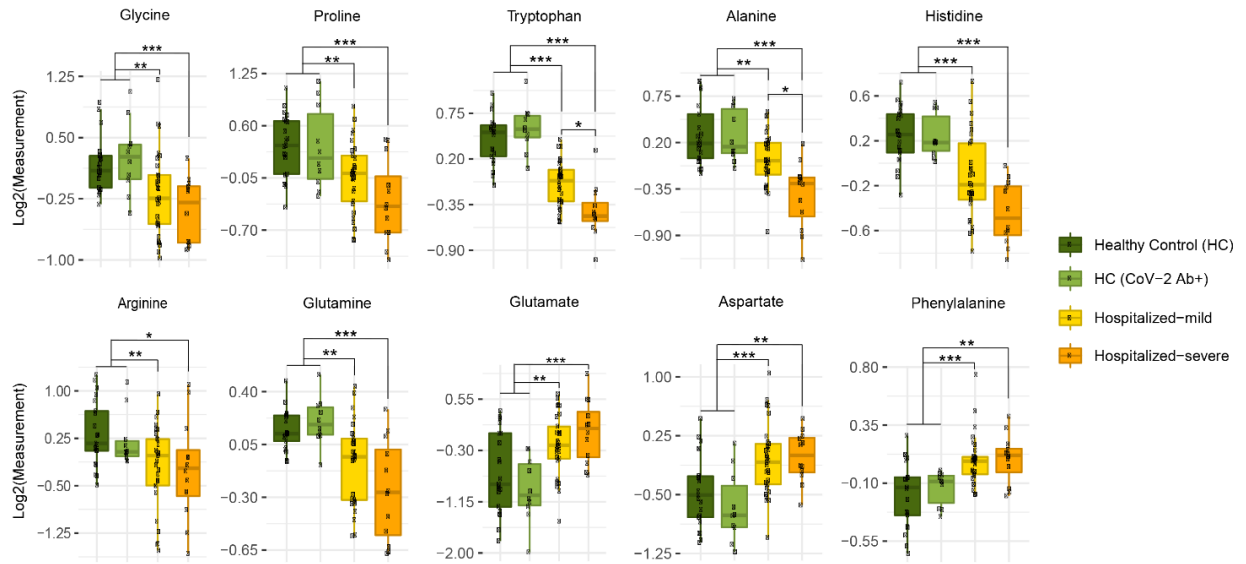

**Figure. S3.** Metabolite profile of amino acids altered in COVID-19 patients. Line within box plots represents median values, \* $p < 0.05$ , \*\* $p < 0.01$ , \*\*\* $p < 0.001$ .

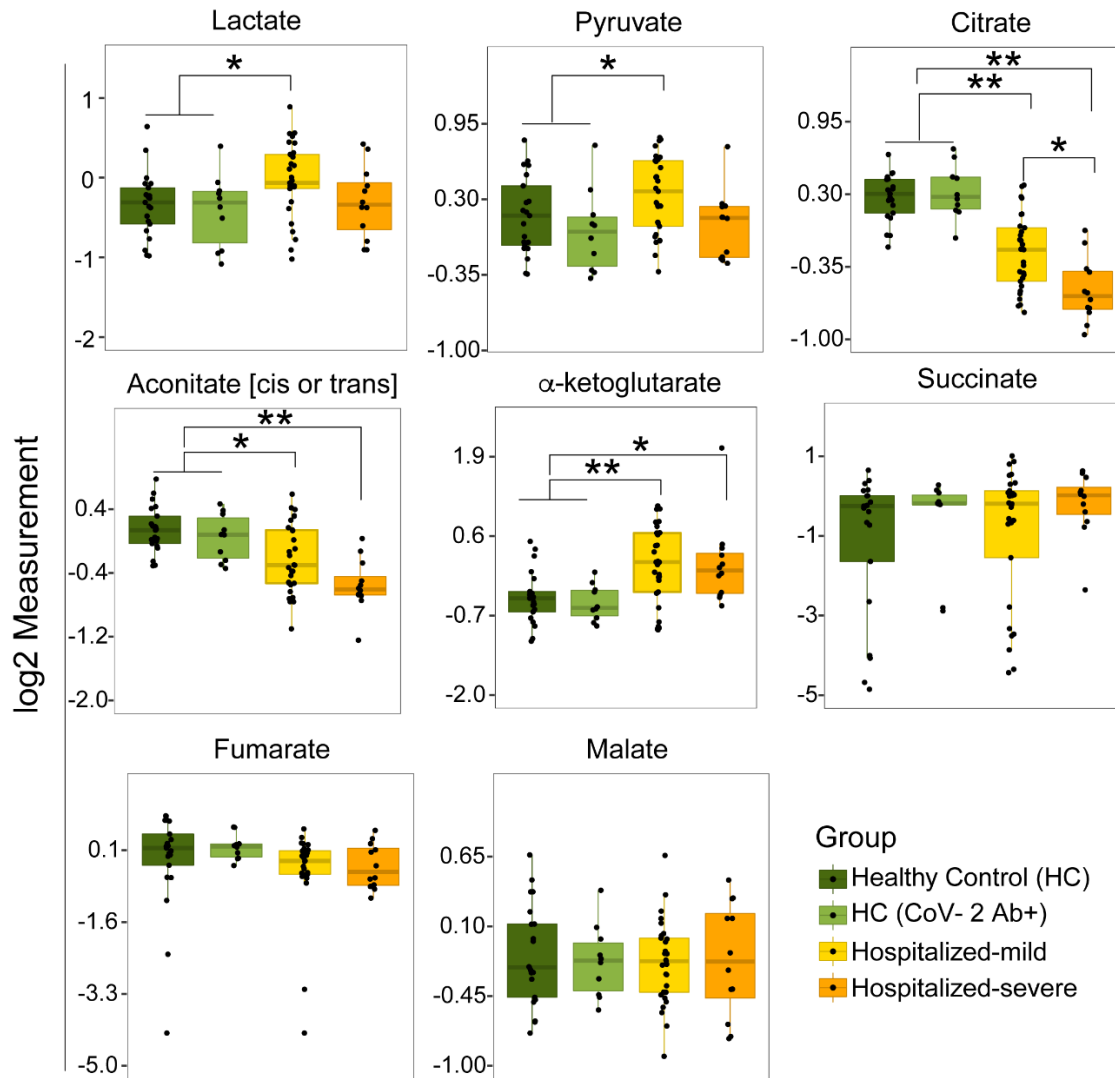

**Figure. S4.** Levels of metabolites related to glycolysis/gluconeogenesis and fructose and mannose metabolism and the TCA cycle.



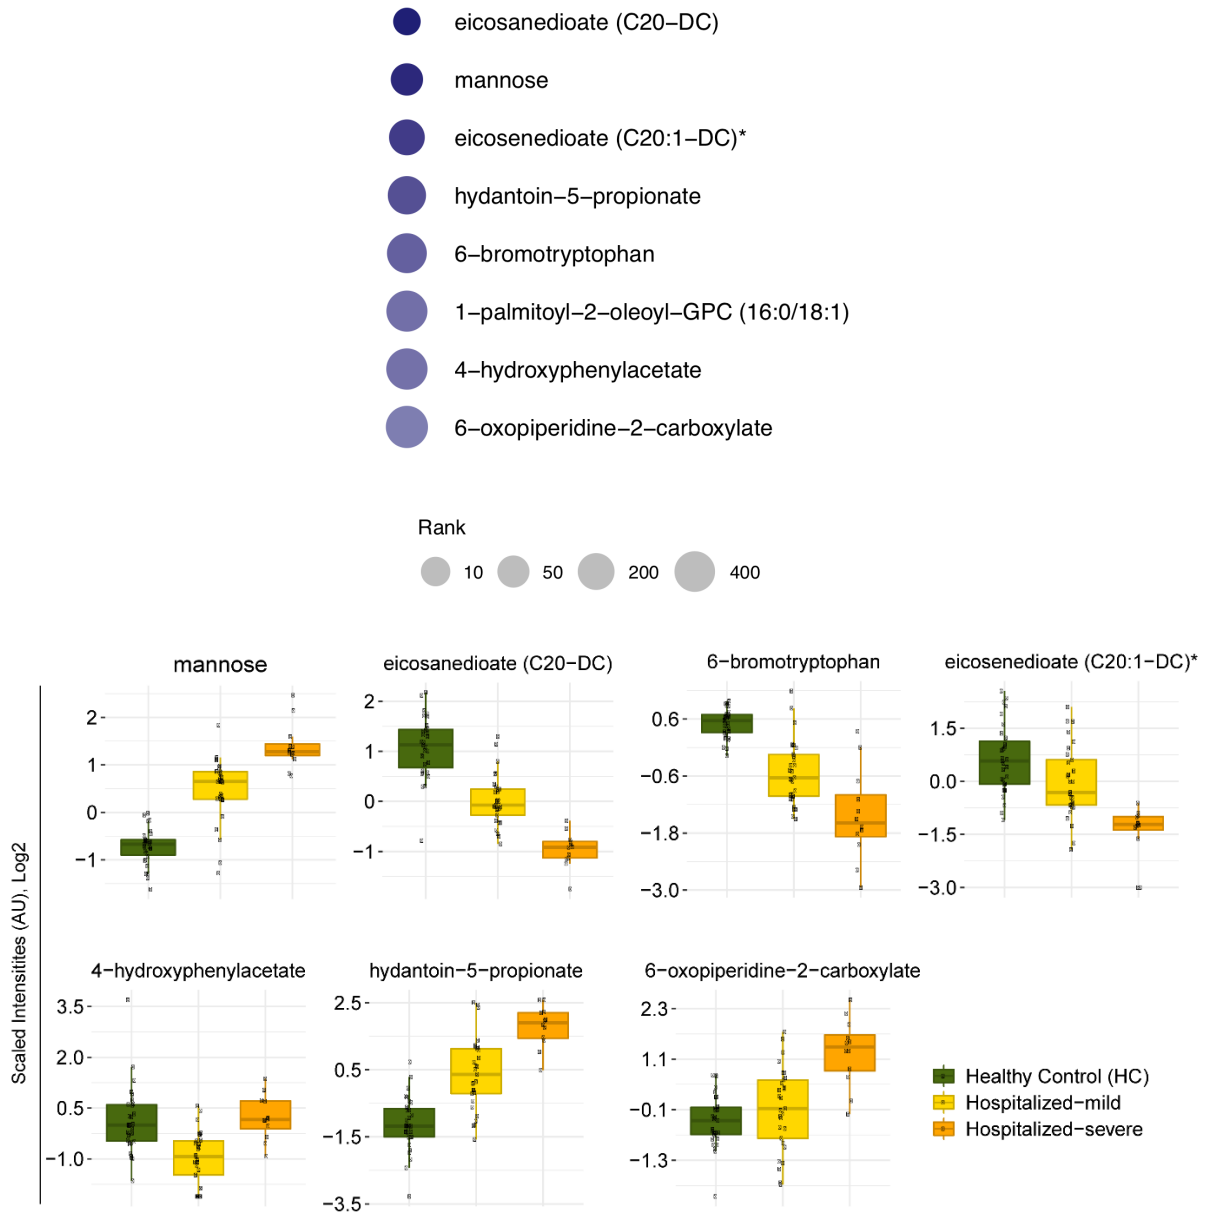

**Figure. S5.** Biomarker of the COVID-19 severity identified by MUVR. Size of the bubble indicates rank. Box plot of the biomarkers indicating the level in HCs and COVID-19 patients.

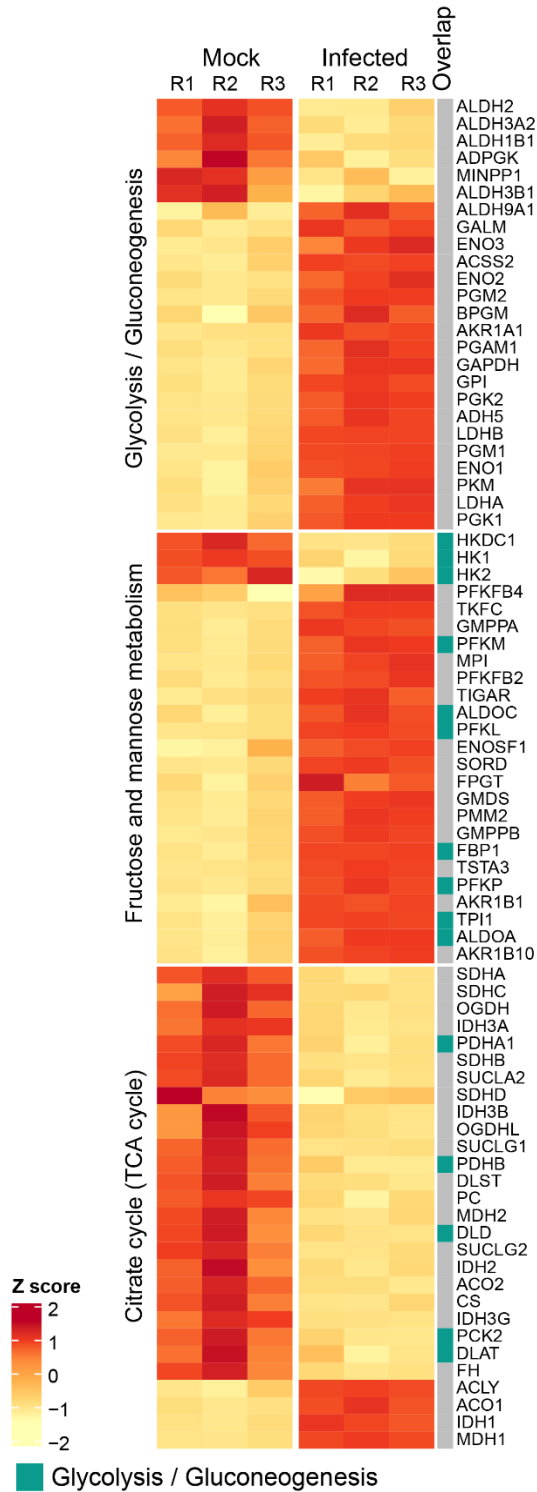

**Figure S6:** Differential protein abundance in Calu-3 cells following SARS-CoV-2 infection after 24 hrs. The analysis was restricted to glycolysis/gluconeogenesis, fructose and mannose metabolism and TCA cycle.

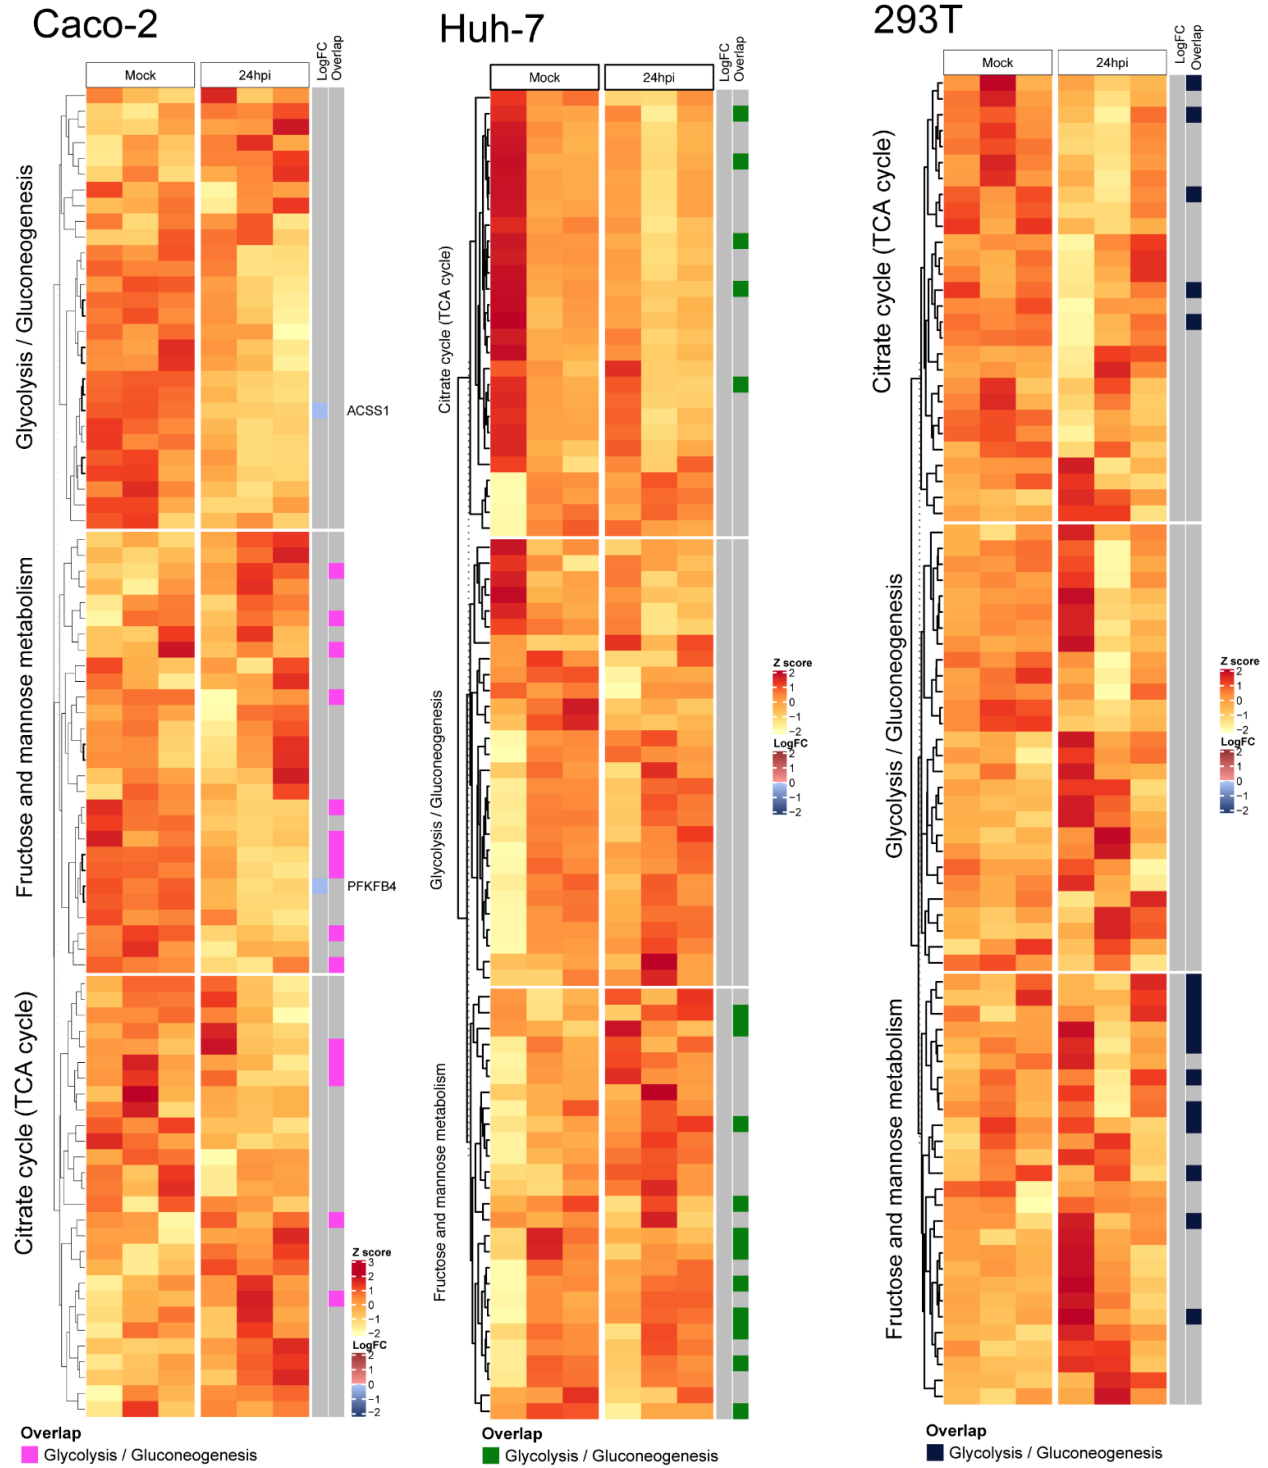

**Figure S7:** Differential protein abundance in Caco-2, Huh7 and 293FT cells following SARS-CoV-2 infection after 24 hrs. The analysis was restricted to glycolysis/gluconeogenesis, fructose and mannose metabolism and TCA cycle.
